# Supplementary material for: A shape memory hydrogel induced by the interactions between metal ions and phosphate
Source: Royal Society of Chemistry journal article supplement (doi:10.1039/c3sm52666f), 2013-11-22
Supplement: c3sm52666f.pdf [file c3sm52666f.pdf]

# Supplementary information

## Shape memory hydrogel induced by the interactions between metal ions and phosphate

Because of the association of the  $\text{-OH}$  of the IPPA around the  $\text{Fe}^{3+}$  ions, the H-O bonds become longer. As a result, the peak of P-OH at  $1106\text{ cm}^{-1}$  becomes stronger and broader after adding  $\text{Fe}^{3+}$ , and the peak moves to right side for  $2\text{ cm}^{-1}$ .

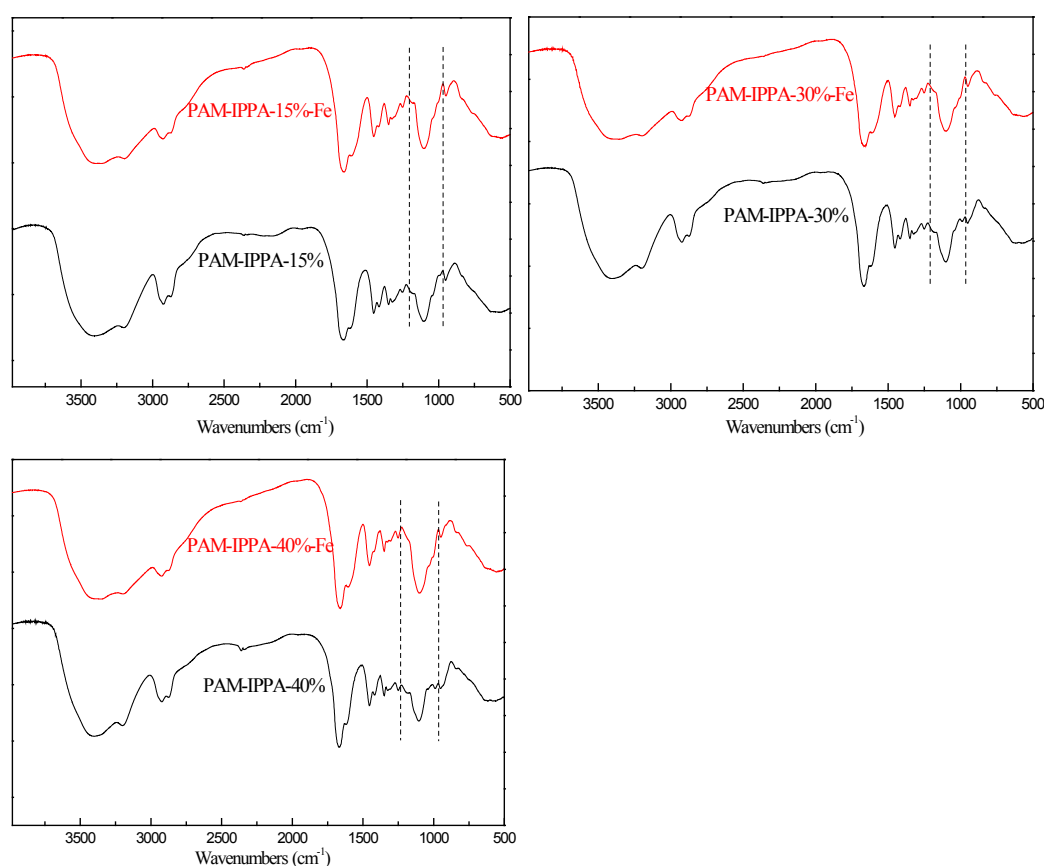

Fig. S1 ATR-FTIR spectra of copolymers before and after immersed in  $\text{FeCl}_3$

Before immersed in  $\text{Fe}^{3+}$  solution, the sample disks prepared in molds were all of  $1000\text{ }\mu\text{m}$  of thickness. After immersed in  $\text{FeCl}_3$  solution, disks swelled in different degrees. Fig. S2 shows  $G'$  and  $G''$  of hydrogels at the gap of  $1000$  and  $1400\text{ }\mu\text{m}$  after immersed in  $\text{Fe}^{3+}$ . There are some differences of the results at the gap of  $1000$  and  $1400\text{ }\mu\text{m}$ . However, it had little influence on the results of overall trend.

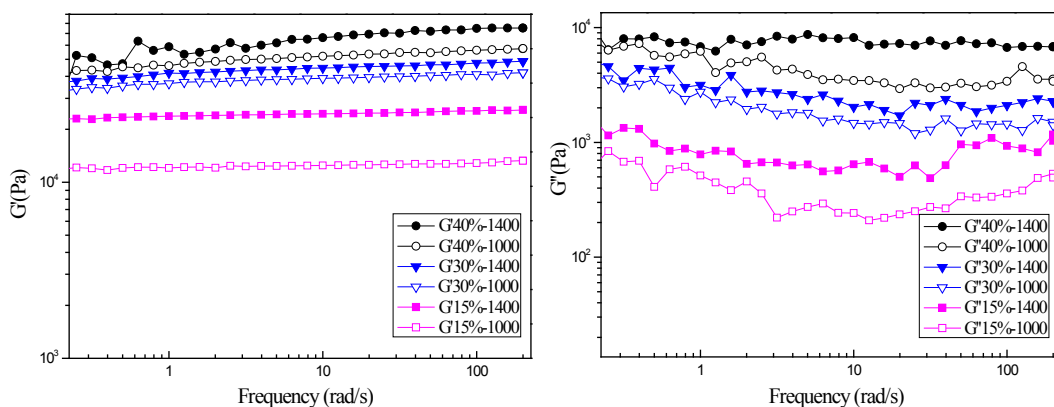

Fig.S2  $G'$  and  $G''$  of hydrogels at 1400 and 1000  $\mu\text{m}$  after immersed in  $\text{Fe}^{3+}$

As shown in Fig. S3, when the bended hydrogel immersed in alkaline water solution, the hydrogel can recover to its original shape because of the precipitation of the  $\text{Fe}^{3+}$  ions. However, it can not be bended again after immersed in acid solution.

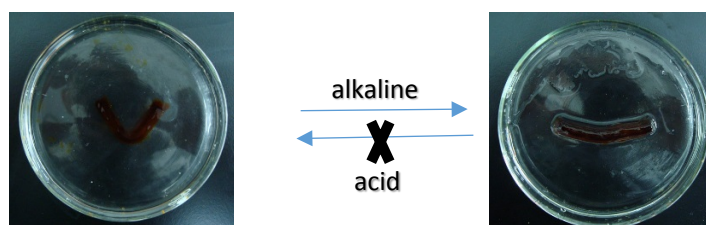

Fig. S3 The influence of the different pH

Hydrogel sample was prepared and immersed in distilled water to swell. After 2 days, the sample swelled to a soft hydrogel disk with a diameter of 55 mm, and then it was immersed in the 0.1mM of  $\text{Fe}^{3+}$  solution. As time passed, the hydrogel shrunk, and the diameter was 25 mm after 3 days. Of course it showed that it could recover to its original volume as the complexing of the  $\text{Fe}^{3+}$  with the EDTA, and it was reversible. The size of the volume of the hydrogel depended on the time of being in solution.

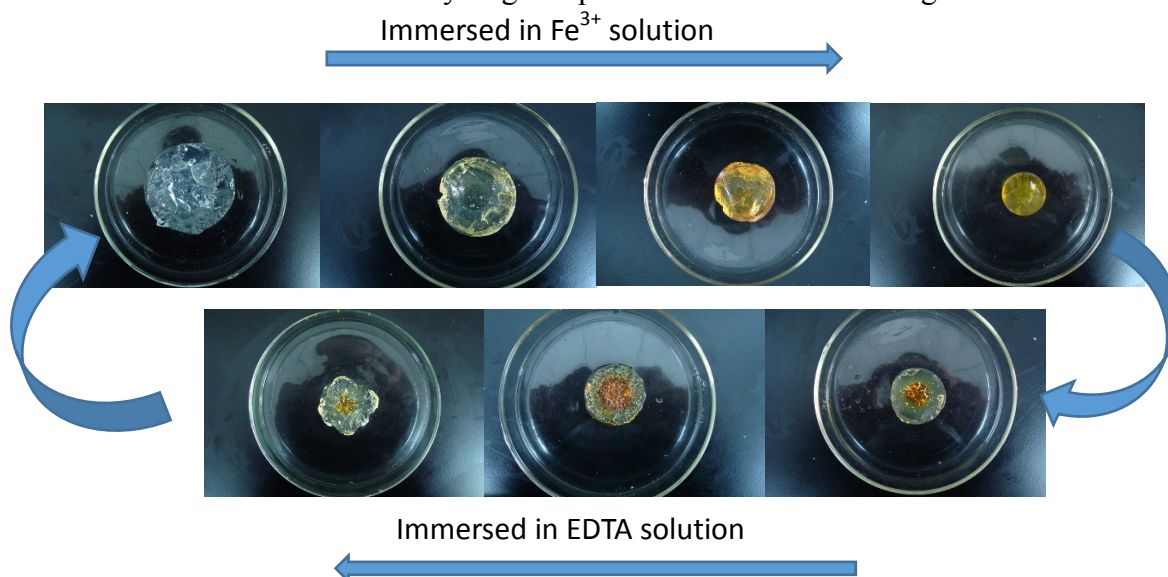

Fig. S4 Reversible swell-shrink ability of the hydrogel
